# Supplementary material for: An interdigitated electrode with dense carbon nanotube forests on conductive supports for electrochemical biosensors
Source: Royal Society of Chemistry journal article supplement (doi:10.1039/c8an00528a), 2018-01-01
Supplement: c8an00528a1.pdf [file c8an00528a1.pdf]

## **An interdigitated electrode with dense carbon nanotube forests on conductive supports for electrochemical biosensors**

Hisashi Sugime,<sup>\*‡<sup>a</sup></sup> Takuya Ushiyama,<sup>‡<sup>b</sup></sup> Keita Nishimura,<sup><sup>b</sup></sup> Yutaka Ohno<sup><sup>b,c</sup></sup> and Suguru Noda<sup><sup>d,e</sup></sup>

\*E-mail: sugime@aoni.waseda.jp

‡These authors contributed equally to this work

<sup>a</sup>Waseda Institute for Advanced Study, Waseda University, 1-6-1 Nishi Waseda, Shijuku-ku, Tokyo 169-8050, Japan

<sup>b</sup>Graduate School of Engineering, Nagoya University, Furo-cho, Chikusa-ku, Nagoya 464-8603, Japan

<sup>c</sup>Institute of Materials and Systems for Sustainability, Nagoya University, Furo-cho, Chikusa-ku, Nagoya 464-8603, Japan

<sup>d</sup>Department of Applied Chemistry, School of Advanced Science and Engineering, Waseda University, 3-4-1 Okubo, Shinjuku-ku, Tokyo 169-8555, Japan

<sup>e</sup>Waseda Research Institute for Science and Engineering, Waseda University, 3-4-1 Okubo, Shinjuku-ku, Tokyo 169-8555, Japan

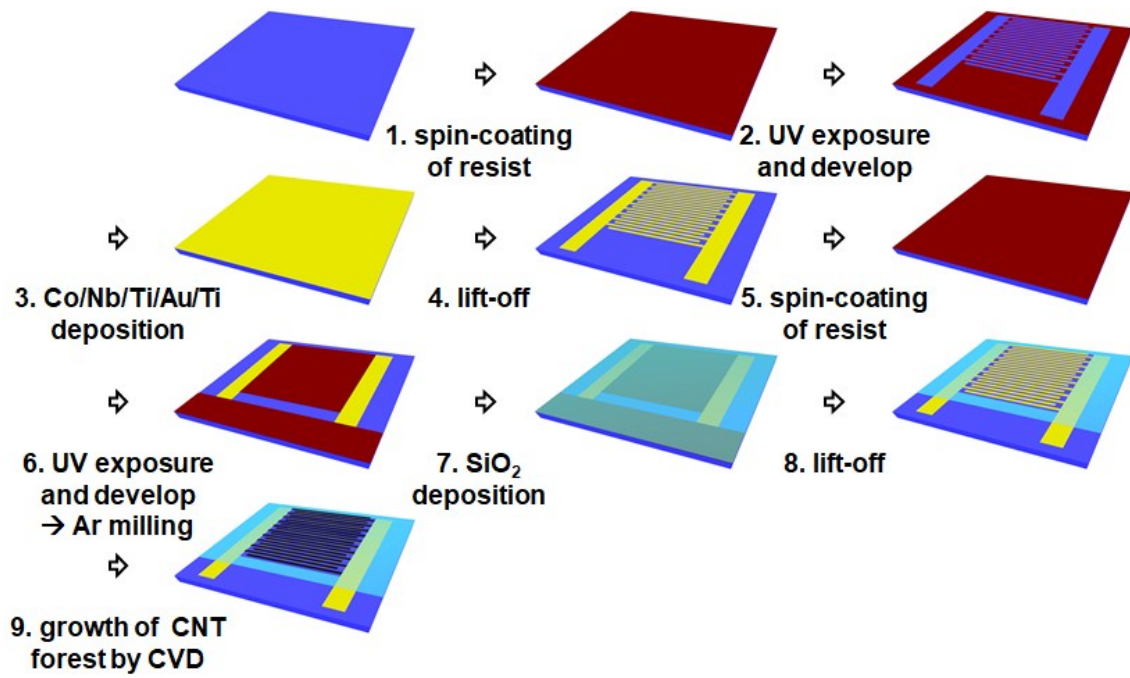

**Fig. S1** Detailed fabrication process of CNTF-IDE with UV lithography and CVD.

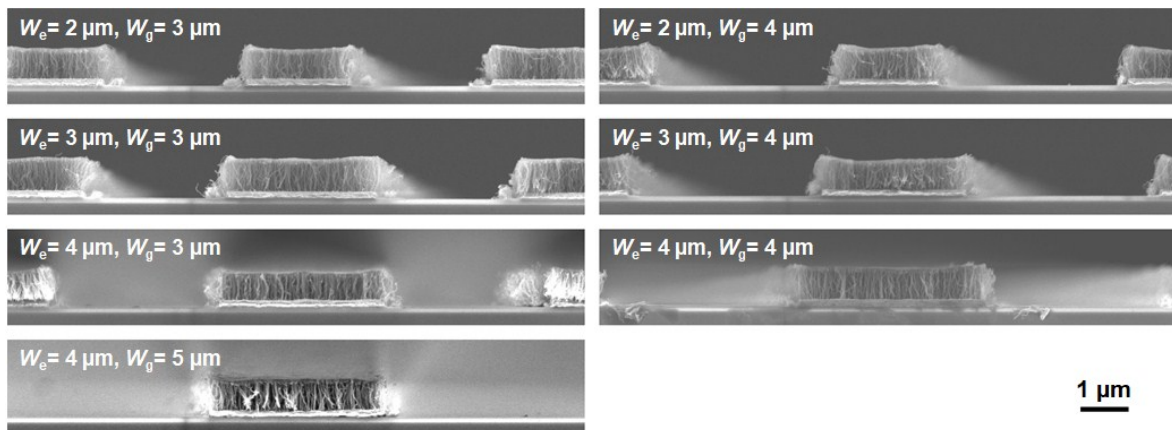

**Fig. S2** Side-view SEM images of the CNT forests with different electrode design.

KCl (100 mM)

(a) CNTF-IDE

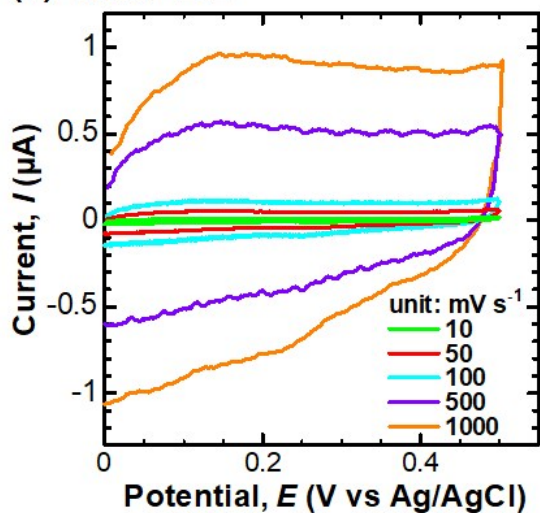

(b) Au-IDE

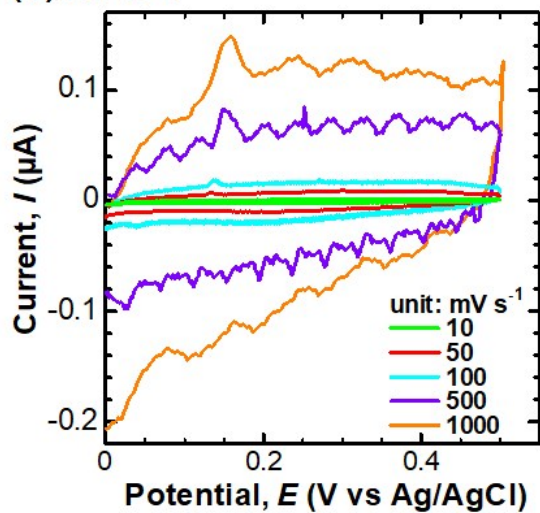

**Fig. S3** Background measurement of single-mode CV with (a) CNTF-IDE and (b) Au-IDE ( $W_e = 2$   $\mu\text{m}$  and  $W_g = 3$   $\mu\text{m}$ ) with different scan rate ( $v$ ). The solution was KCl (100 mM).
